# Supplementary material for: Pharmacogenetic association study of cannabis use in chronic pain
Source: Research Square preprint supplement (doi:10.21203/rs.3.rs-6957614/v1), 2025-06-27
Supplement: Supplementary file 1 [file 7ef3133f411a1a7331e2418c.docx]

1. Supplementary Tables

Supplementary Table S1. Probe and primer designs for genotyping with TaqMan

| Gene | Variant | Probe type | Probe design | Primer Type | Primer Design |
| --- | --- | --- | --- | --- | --- |
| ABCB1 | rs1045642 | REF | TGCCCT+CA+C+A+AT+CTCTTCCT | Forward | CATTAGGCAGTGACTCGATGAA |
|  |  | A to G | TGCCCTCA+C+G+AT+CTCTTCCT | Reverse | TGAGAACATTGCCTATGGAGAC |
|  |  | A to T | TGCCCT+CA+C+T+AT+CTCTTCCT | - | - |
| AKT1 | rs2494732 | REF | ATCCCA+GC+T+A+CAGGCTACAC | Forward | TATCAGTGTAGTCTGGGAGGTG |
|  |  | T to C | ATCCCAGC+T+G+CAGGCTACAC | Reverse | CTTTCAGGGCTGCTCAAGAA |
|  |  | T to G | ATCCCAGC+T+C+CAGGCTACAC | - | - |
| BDNF | rs6265 | REF | CTCTTCT+ATC+A+C+G+TGT+TCGAAAGT | Forward | TTCATTGGGCCGAACTTTCT |
|  |  | C to T | CTCTT+CT+ATC+A+T+G+TGT+TCGAAAGT | Reverse | CCCAAGGCAGGTTCAAGAG |
| CHRM3 | rs74722579 | REF | ACCCAGGTA+C+C+AG+TTTCTT | Forward | TAGCAGTTATCACGTGTTAGT |
|  |  | G to C | ACCCAGGTA+C+G+AG+TTTCTT | Reverse | TGAAGAGTAGAATGGGAGTTTC |
|  | rs115455482 | REF | CTCAAACTTAT+TC+AT+C+C+T+AAATGA | Forward | TGTTAAGCTACGGATGAAATACTGA |
|  |  | C to T | CTCAAACTTAT+TC+AT+C+T+T+AAATGA | Reverse | TGATGAAGCTGGAGAATGGC |
| CHRNA2 | rs56372821 | REF | TGCCT+C+G+GCCTCCAAAG | Forward | GGATGGTCTCGATCTCCTGA |
|  |  | G to A | TGC+CT+C+A+GCCTCCAAAG | Reverse | GAGATGATTTAAAGTATATGGGAGTGCC |
| CNR1 | rs806380 | REF | CAAA+GTT+TT+CA+A+TTAA+GTAAAAGC | Forward | CGCCCAGAAAGCAATTA |
|  |  | A to G | CAAA+GTT+TT+CA+G+TTAA+GTAAAAGC | Reverse | GACCAAATCTCATATGCAAGA |
|  | rs806378 | REF | CCTCATC+ACG+T+C+G+TATAATCAGGA | Forward | CCCAGCACATCCCTCTATTAC |
|  |  | C to T | CCTCATC+ACG+T+T+G+TA+TAATCAGGA | Reverse | GATGCCTCTGTGTTTGGAGA |
|  | rs806374 | REF | ACAGGCATA+AA+GT+G+T+TA+AATGTGG | Forward | GACAGGACACAGAGTCAATGAA |
|  |  | T to C | ACAGGCATA+AA+GT+G+C+TA+AATGTGG | Reverse | CAGTGATGAGATCCTGGAAGTG |
|  | rs806368 | REF | AGAAACTC+TC+CC+A+T+CC+GAAA | Forward | CCAGTAGGCCTAGTACAGTCAA |
|  |  | T to C | AACTCTC+CC+A+C+CCGAAA | Reverse | GTTTGAGCAGTGGCCTACA |
|  | rs2023239 | REF | CAGGA+CC+A+T+GT+AA+GGAACAG | Forward | AAGTATGGGTGGGAGTTGAAAG |
|  |  | T to C | CAGGA+CC+A+C+GT+AAGGAACAG | Reverse | GGACACAGAAGACAGTCACAATA |
|  | rs1049353 | REF | CAATCTT+GA+C+C+GT+GCTCTTGA | Forward | GCAGACGTGTCTGTGGAC |
|  |  | C to T | TGGCAATCTTGA+C+T+GT+GCTCTTGA | Reverse | GCAAACAATGCAGCCAGTG |
|  | rs6454674 | REF | AAGCAA+TA+AC+T+T+TC+ACCCAGAATT | Forward | ACATAGATCAATTCAGACTTCTCCA |
|  |  | T to G | AAGCAATAAC+T+G+TC+ACCCAGAATT | Reverse | TGAAAGATTTGGTTATAGCTTCTTGA |
| CNR2 | rs2229579 | REF | CTTCTTCCAG+T+G+AGCCAGG | Forward | AGCCAAGCTGCCAATGAA |
|  |  | G to A | CTTCTTCC+AG+T+A+AG+CCAGG | Reverse | TGCTGTGTTGTGCACTCTT |
|  |  | G to T | CTTCTTCC+AG+T+T+AG+CCAGG | - | - |
|  | rs2501432 | REF | TGTCCTCCCAC+C+A+ACTCCG | Forward | TTTGCCTCTGACCCAAGG |
|  |  | T to C | TGTCCTCCCAC+C+GACTCC | Reverse | TATGCTCTACGGAGTGGAGAG |
|  |  | T to G | TGTCCTCCCAC+C+CACTCC | - | - |
| COMT | rs4680 | REF | TCCTTC+A+C+GCCAGCGAA | Forward | GAGGCTCATCACCATCGAG |
|  |  | G to A | TCCTTC+A+T+GCCAGCGAA | Reverse | TTTCCAGGTCTGACAACGG |
| CYP2C9 | rs1799853 | REF | TGAACA+C+G+GTCCTCAATGCT | Forward | TCAGCAATGGAAAGAAATGGAAG |
|  |  | C to T | TGAACA+C+A+GT+CCTCAATGCT | Reverse | TTTCTCAACTCCTCCACAAGG |
|  | rs1057910 | REF | TCCAGAG+ATA+C+A+TT+GACCTTCTCC | Forward | CCACATGCCCTACACAGATG |
|  |  | A to C | TCCAGAGATA+C+C+TT+GACCTTCTC | Reverse | TTAATGTCACAGGTCACTGCAT |
|  |  | A to G | TCCAGAGATA+C+G+TT+GACCTTCTC | - | - |
| CYP3A5 | rs776746 | REF | TTGTCTT+TC+A+A+TA+TC+TCTTCCCTG | Forward | CCACCCAAGGCTTCATA |
|  |  | T to C | TTGTCTTTC+A+G+TA+TCTCTTCCCTG | Reverse | GAATGCTCTACTGTCATTTCTAAC |
| FAAH | rs324420 | REF | TCTCAGGCC+CCA+AGGCAG | Forward | CAACTGTGTGACCTCCTATCTG |
|  |  | C to A | TCTCAGGC+C+ACA+AGGCAG | Reverse | GAGGCAGAGCATACCTTGTAG |
|  | rs2295633 | REF | TCCCAC+AGG+G+T+CACAGTT | Forward | TCCATCCCTGGCATCCT |
|  |  | A to G | TCCCACAGGG+C+CACAGTT | Reverse | CAGGGCTAAAGTTCTCCATCAA |
|  |  | A to T | TCCCAC+AGG+G+A+CACAGTT | - | - |
| GABRA2 | rs279858 | REF | AGCTACT+GA+TT+T+T+TT+CCCATTGTG | Forward | AGCAGAGTCCCATCATCCT |
|  |  | T to C | AGCTACTGA+TT+T+C+TT+CCCATTGTG | Reverse | GGTCCTATGAATATCCTTCGACTAAA |
| HES7 | rs1442849 | REF | TGGCTTGG+C+C+TCTGAGAT | Forward | TCTCTCTCACCTGGCTAACA |
|  |  | C to T | TGGCTT+GG+C+T+TC+TGAGAT | Reverse | TACGGGTACTAGAGTGGGAATG |
| KAT2B | rs9829896 | REF | CCTACGTTG+G+C+GGTGTTCTA | Forward | GAATTGGTCTATCTCACCACCA |
|  |  | C to A | CCTACGT+TG+G+A+GGTGTTCTA | Reverse | AGGATCTTTGGAAGTCATTCTATCT |
|  |  | C to T | CCTACGT+TG+G+T+GGTGTTCTA | - | - |
| NRG1 | rs17664708 | REF | TCATGGTTTT+C+C+ACCTCCATTC | Forward | CAGCCTCTGGGATTGAACTT |
|  |  | C to T | TCATGGTT+TT+C+T+AC+CTCCATTC | Reverse | TCACCTCCATACCCTCCTATTC |
| OPRM1 | rs510769 | REF | TGTATATT+CA+AAT+A+C+TA+CATGTGA | Forward | CAATTGCACTGATGCCTTGG |
|  |  | C to T | TGTATATT+CA+AAT+A+T+TA+CATGTGA | Reverse | CGTGATCATGGAGGGACTG |
|  | rs1799971 | REF | TCGGACAGG+T+T+GC+CATCTAAG | Forward | GTGTGGAAGCTCTCAGTA |
|  |  | A to G | TCGGACAGG+T+C+GCCATCTAAG | Reverse | AAACAGATATATGGCATTTCACAT |
| P2RX7 | rs7958311 | REF | CATCACTGC+C+G+TC+CCAAATAC | Forward | TACTGGGACTGCAACCTAGA |
|  |  | G to A | CATCACT+GC+C+A+TC+CC+AAATAC | Reverse | TAGCCAGGGTACAAGGACA |
|  |  | G to C | CATCACTGC+C+C+TC+CCAAATAC | - | - |

ABCB1 = ATP binding cassette subfamily B member 1; AKT1 = AKT serine/threonine kinase 1; BDNF = Brain derived neurotrophic factor; CHRM3 = Cholinergic receptor muscarinic 3; CHRNA2 = Cholinergic receptor nicotinic α2; CNR1 = Cannabinoid receptor 1; CNR2 = Cannabinoid receptor 2; COMT = Catechol-O-methyltransferase; CYP 2C9 = cytochrome P450 family 2 subfamily C member 9; CYP 3A5 = cytochrome P450 family 3 subfamily A member 5; FAAH = Fatty acid amide hydrolase; GABRA2 = Gamma-aminobutyric acid type A receptor alpha2 subunit; HES7 = Hes family bHLH transcription factor 7; KAT2B = Lysine acetyltransferase 2B; NRG1 = Neuregulin 1; OPRM1 = Opioid receptor mu 1; P2RX7 = purinergic receptor P2X 7

Supplementary Table S2. Cannabis use characteristics

|  | Overall (N = 100)*1* | Current use (N = 92)*1* | Past use (N = 8)*1* |
| --- | --- | --- | --- |
| Main method of use |  |  |  |
| Inhaled | 44 (44%) | 43 (47%) | 1 (12%) |
| Oral | 45 (45%) | 40 (43%) | 5 (62%) |
| Other or more than one | 11 (11%) | 9 (9.8%) | 2 (25%) |
| Frequency of use |  |  |  |
| ≤ Weekly | 4 (4.0%) | 3 (3.3%) | 1 (12%) |
| More than once per week | 15 (15%) | 13 (14%) | 2 (25%) |
| Daily | 27 (27%) | 26 (28%) | 1 (12%) |
| More than once daily | 54 (54%) | 50 (54%) | 4 (50%) |
| Duration of cannabis use (years) | 5.11 (6.89) | 5.51 (7.05) | 0.47 (0.52) |
| Age at first cannabis use (years) | 23.73 (15.39) | 23.42 (14.97) | 27.25 (20.58) |
| Age at initiation of daily cannabis use (years) | 34.27 (17.12) | 33.89 (17.11) | 39.77 (17.75) |
| Unknown | 8 | 6 | 2 |
| Quantity used by inhalation (grams per day of use) | 1.22 (1.05) | 1.22 (1.05) | NA (NA) |
| Unknown | 67 | 59 | 8 |
| THC content of cannabis used by inhalation (%) | 13.12 (9.23) | 13.12 (9.23) | NA (NA) |
| Unknown | 62 | 54 | 8 |
| CBD content of cannabis used by inhalation (%) | 4.23 (5.79) | 4.23 (5.79) | NA (NA) |
| Unknown | 61 | 53 | 8 |
| THC/CBD content (inhaled) |  |  |  |
| THC > CBD*2* | 27 (71%) | 27 (71%) | 0 (NA%) |
| CBD > THC*3* | 4 (11%) | 4 (11%) | 0 (NA%) |
| THC ≈ CBD | 7 (18%) | 7 (18%) | 0 (NA%) |
| Unknown | 62 | 54 | 8 |
| THC/CBD content (oral) |  |  |  |
| THC > CBD*2* | 5 (10%) | 5 (11%) | 0 (0%) |
| CBD > THC*3* | 34 (69%) | 31 (70%) | 3 (60%) |
| THC ≈ CBD | 10 (20%) | 8 (18%) | 2 (40%) |
| Unknown | 51 | 48 | 3 |
| *1* N (%); Mean (SD); THC = Δ9-tetrahydrocannabinol; CBD = cannabidiol; *2* Containing at least twice the amount of THC compared to CBD; *3* Containing at least twice the amount of CBD compared to THC; | | | |

Supplementary Table S3. Participant characteristics and studied phenotypes

|  | Pain response | | | CUDIT-R | | | Psychotic adverse events | | |
| --- | --- | --- | --- | --- | --- | --- | --- | --- | --- |
| Non-responder (N = 20)*1* | Responder (N = 74)*1* | p-value*2* | Negative (< 13) (N = 75)*1* | Positive (≥ 13) (N = 25)*1* | p-value*2* | Absence (N = 94)*1* | Presence (N = 6)*1* | p-value*3* |
| Demographics | | | | | | | | | |
| Female sex | 15 (75.0%) | 48 (64.9%) | 0.39 | 53 (70.7%) | 14 (56.0%) | 0.18 | 62 (66.0%) | 5 (83.3%) | 0.66 |
| Age (years) | 50.95 (13.12) | 46.94 (13.15) | 0.23 | 51.01 (12.07) | 39.06 (11.97) | <0.001 | 47.95 (13.19) | 49.06 (11.96) | 0.84 |
| Ethnic origin*4* |  |  | 0.47 |  |  | 0.20 |  |  | >0.99 |
| North American | 20 (100.0%) | 63 (85.1%) |  | 68 (91.9%) | 20 (80.0%) |  | 82 (88.2%) | 6 (100.0%) |  |
| European | 0 (0.0%) | 7 (9.5%) |  | 3 (4.1%) | 4 (16.0%) |  | 7 (7.5%) | 0 (0.0%) |  |
| Latin, Central and South American | 0 (0.0%) | 2 (2.7%) |  | 2 (2.7%) | 0 (0.0%) |  | 2 (2.2%) | 0 (0.0%) |  |
| Other | 0 (0.0%) | 2 (2.7%) |  | 1 (1.4%) | 1 (4.0%) |  | 2 (2.2%) | 0 (0.0%) |  |
| Chronic pain and health status | | | | | | | | | |
| DN4 score ≥ 4 | 16 (80.0%) | 48 (64.9%) | 0.20 | 50 (66.7%) | 15 (60.0%) | 0.55 | 61 (64.9%) | 4 (66.7%) | >0.99 |
| Pain duration (years)*5* | 20.0 (7.4, 24.4) | 11.8 (6.9, 21.2) | 0.27 | 15.0 (9.0, 23.7) | 7.5 (4.4, 13.2) | 0.004 | 12.0 (6.5, 22.0) | 17.3 (10.9, 20.0) | 0.58 |
| BPI pain severity*4* | 5.62 (4.00, 6.31) | 5.00 (3.50, 6.00) | 0.21 | 5.25 (3.50, 6.25) | 5.25 (3.25, 6.00) | 0.63 | 5.25 (3.50, 6.25) | 4.00 (4.00, 4.25) | 0.18 |
| BPI pain interference*4* | 3.38 (1.66, 6.19) | 3.88 (2.00, 5.50) | 0.86 | 3.74 (1.66, 5.08) | 4.12 (2.00, 6.00) | 0.32 | 3.74 (1.59, 5.50) | 5.38 (3.88, 5.57) | 0.17 |
| EQ-5D-5L index*4* | 0.68 (0.47, 0.76) | 0.70 (0.51, 0.82) | 0.54 | 0.71 (0.52, 0.82) | 0.54 (0.40, 0.78) | 0.11 | 0.68 (0.48, 0.82) | 0.70 (0.64, 0.76) | 0.89 |
| EQ VAS | 57.8 (19.6) | 63.2 (19.6) | 0.20 | 62.6 (21.1) | 59.5 (20.8) | 0.38 | 62.0 (21.3) | 58.3 (14.7) | 0.45 |
| BMI (kg/m2)*5* | 28.6 (6.5) | 27.4 (6.2) | 0.22 | 28.7 (6.2) | 25.1 (5.3) | 0.010 | 28.0 (6.1) | 24.5 (6.5) | 0.27 |
| Cannabis use characteristics | | | | | | | | | |
| Main method of use |  |  | 0.22 |  |  | <0.001 |  |  | 0.84 |
| Inhaled | 6 (30.0%) | 36 (48.6%) |  | 25 (33.3%) | 19 (76.0%) |  | 42 (44.7%) | 2 (33.3%) |  |
| Oral | 10 (50.0%) | 31 (41.9%) |  | 40 (53.3%) | 5 (20.0%) |  | 42 (44.7%) | 3 (50.0%) |  |
| Other or more than one | 4 (20.0%) | 7 (9.5%) |  | 10 (13.3%) | 1 (4.0%) |  | 10 (10.6%) | 1 (16.7%) |  |
| Frequency of use |  |  | >0.99 |  |  | 0.49 |  |  | 0.50 |
| ≤ Weekly | 1 (5.0%) | 3 (4.1%) |  | 4 (5.3%) | 0 (0.0%) |  | 4 (4.3%) | 0 (0.0%) |  |
| More than once per week | 3 (15.0%) | 11 (14.9%) |  | 13 (17.3%) | 2 (8.0%) |  | 14 (14.9%) | 1 (16.7%) |  |
| Daily | 5 (25.0%) | 20 (27.0%) |  | 20 (26.7%) | 7 (28.0%) |  | 24 (25.5%) | 3 (50.0%) |  |
| More than once daily | 11 (55.0%) | 40 (54.1%) |  | 38 (50.7%) | 16 (64.0%) |  | 52 (55.3%) | 2 (33.3%) |  |
| Age at first cannabis use (years) | 26.20 (17.19) | 22.49 (14.74) | 0.21 | 25.83 (16.63) | 17.42 (8.34) | 0.005 | 23.75 (15.20) | 23.50 (19.88) | 0.67 |
| Past medical history | | | | | | | | | |
| Musculoskeletal | 20 (100.0%) | 71 (95.9%) | >0.99 | 73 (97.3%) | 24 (96.0%) | >0.99 | 91 (96.8%) | 6 (100.0%) | >0.99 |
| Psychiatric | 13 (65.0%) | 53 (71.6%) | 0.57 | 50 (66.7%) | 20 (80.0%) | 0.21 | 65 (69.1%) | 5 (83.3%) | 0.67 |
| Gastrointestinal | 12 (60.0%) | 39 (52.7%) | 0.56 | 42 (56.0%) | 11 (44.0%) | 0.30 | 49 (52.1%) | 4 (66.7%) | 0.68 |
| Neurologic | 7 (35.0%) | 32 (43.2%) | 0.51 | 32 (42.7%) | 8 (32.0%) | 0.35 | 39 (41.5%) | 1 (16.7%) | 0.40 |
| Cardiovascular | 10 (50.0%) | 28 (37.8%) | 0.33 | 34 (45.3%) | 5 (20.0%) | 0.025 | 38 (40.4%) | 1 (16.7%) | 0.40 |
| Respiratory | 8 (40.0%) | 26 (35.1%) | 0.69 | 24 (32.0%) | 12 (48.0%) | 0.15 | 35 (37.2%) | 1 (16.7%) | 0.41 |
| Metabolic | 5 (25.0%) | 19 (25.7%) | 0.95 | 24 (32.0%) | 2 (8.0%) | 0.018 | 21 (22.3%) | 5 (83.3%) | 0.004 |
| Cancer | 3 (15.0%) | 7 (9.5%) | 0.44 | 7 (9.3%) | 3 (12.0%) | 0.71 | 9 (9.6%) | 1 (16.7%) | 0.48 |
| Concurrent pharmacotherapy | | | | | | | | | |
| Antidepressants | 13 (65.0%) | 39 (52.7%) | 0.33 | 41 (54.7%) | 14 (56.0%) | 0.91 | 50 (53.2%) | 5 (83.3%) | 0.22 |
| Acetaminophen | 8 (40.0%) | 22 (29.7%) | 0.38 | 27 (36.0%) | 6 (24.0%) | 0.27 | 32 (34.0%) | 1 (16.7%) | 0.66 |
| NSAIDs | 8 (40.0%) | 22 (29.7%) | 0.38 | 24 (32.0%) | 8 (32.0%) | >0.99 | 30 (31.9%) | 2 (33.3%) | >0.99 |
| Opioids | 7 (35.0%) | 22 (29.7%) | 0.65 | 27 (36.0%) | 5 (20.0%) | 0.14 | 30 (31.9%) | 2 (33.3%) | >0.99 |
| Antiepileptics | 7 (35.0%) | 18 (24.3%) | 0.34 | 22 (29.3%) | 6 (24.0%) | 0.61 | 25 (26.6%) | 3 (50.0%) | 0.35 |
| Muscle relaxants | 3 (15.0%) | 14 (18.9%) | >0.99 | 15 (20.0%) | 4 (16.0%) | 0.77 | 19 (20.2%) | 0 (0.0%) | 0.59 |
| Benzodiazepines | 4 (20.0%) | 9 (12.2%) | 0.46 | 15 (20.0%) | 0 (0.0%) | 0.019 | 15 (16.0%) | 0 (0.0%) | 0.59 |
| Stimulants | 1 (5.0%) | 7 (9.5%) | >0.99 | 5 (6.7%) | 4 (16.0%) | 0.22 | 9 (9.6%) | 0 (0.0%) | >0.99 |
| Z drugs/benzodiazepine like | 0 (0.0%) | 6 (8.1%) | 0.34 | 4 (5.3%) | 3 (12.0%) | 0.36 | 5 (5.3%) | 2 (33.3%) | 0.055 |
| Biologics/DMARDs | 1 (5.0%) | 2 (2.7%) | 0.52 | 2 (2.7%) | 1 (4.0%) | >0.99 | 3 (3.2%) | 0 (0.0%) | >0.99 |
| Phenotype validation | | | | | | | | | |
| Cannabis use |  |  | 0.004 |  |  |  |  |  |  |
| Current use | 15 (75.0%) | 72 (97.3%) |  |  |  |  |  |  |  |
| Past use | 5 (25.0%) | 2 (2.7%) |  |  |  |  |  |  |  |
| Online survey pain relief (≥ 30%) |  |  | 0.19 |  |  |  |  |  |  |
| Non-responder | 2 (33.3%) | 4 (10.8%) |  |  |  |  |  |  |  |
| Responder | 4 (66.7%) | 33 (89.2%) |  |  |  |  |  |  |  |
| *1* N (%); Median (IQR) for pain duration, BPI pain severity, BPI pain interference and EQ-5D-5L index; otherwise Mean (SD); DMARDs = Disease-modifying antirheumatic drugs; NSAIDs = Non Steroidal Anti-Inflammatory Drugs; *2* Pearson's Chi-squared test; Two Sample t-test; Fisher's exact test *3* Fisher's exact test; Two Sample t-test *4* Data available N = 99; *5* Data available N = 98; | | | | | | | | | |

Supplementary Table S4. Participant characteristics and phenotypes according to availability of DNA

|  | DNA (N = 77)*1* | No DNA (N = 23)*1* | p-value*2* |
| --- | --- | --- | --- |
| Demographics | | | |
| Female sex | 55 (71.4%) | 12 (52.2%) | 0.085 |
| Age (years) | 50.4 (12.7) | 40.1 (11.1) | <0.001 |
| Ethnic origin*3* |  |  | 0.54 |
| North American | 68 (89.5%) | 20 (87.0%) |  |
| European | 6 (7.9%) | 1 (4.3%) |  |
| Latin, Central and South American | 1 (1.3%) | 1 (4.3%) |  |
| Other | 1 (1.3%) | 1 (4.3%) |  |
| Cannabis use, chronic pain and health status | | | |
| Cannabis use |  |  | >0.99 |
| Current use | 71 (92.2%) | 21 (91.3%) |  |
| Past use | 6 (7.8%) | 2 (8.7%) |  |
| Pain duration (years)*4* | 15.0 (7.9, 23.6) | 8.5 (4.2, 18.0) | 0.022 |
| BPI pain severity*3* | 5.25 (3.50, 6.06) | 5.25 (2.50, 6.12) | 0.75 |
| BPI pain interference*5* | 3.62 (1.56, 5.60) | 3.88 (2.62, 5.12) | 0.96 |
| EQ-5D-5L index*3* | 0.70 (0.48, 0.81) | 0.66 (0.52, 0.83) | 0.62 |
| EQ VAS | 62.6 (20.8) | 59.1 (21.8) | 0.62 |
| Phenotypes | | | |
| Pain relief (≥ 30%)*6* | 57 (78.1%) | 17 (81.0%) | >0.99 |
| Psychotic adverse events | 6 (7.8%) | 0 (0.0%) | 0.33 |
| CUDIT-R ≥ 13 | 17 (22.1%) | 8 (34.8%) | 0.22 |
| *1* n (%); Mean (SD) *2* Pearson's Chi-squared test; Wilcoxon rank sum test; Fisher's exact test *3* Data available N = 99; *4* Data available N = 98; *5* Data available N = 97; *6* Data available N = 94; | | | |

Supplementary Table S5. Hardy-Weinberg equilibrium tests

| Gene (variant) | p-value | adjusted p-value | Callrate (%) | Ref | Alt | Alt allele frequency | Kept in the analyses |
| --- | --- | --- | --- | --- | --- | --- | --- |
| ABCB1 (rs1045642) | < 0.001 | 0.001 | 64.9 | A | G/T | - | No |
| AKT1 (rs2494732) | 0.081 | 1.000 | 70.1 | T | C/G | - | No |
| BDNF (rs6265) | 0.283 | 1.000 | 100.0 | C | T | 0.188 | Yes |
| CHRM3 (rs115455482) | 0.002 | 0.035 | 100.0 | C | T | 0.442 | No |
| CHRM3 (rs74722579) | < 0.001 | < 0.001 | 98.7 | G | C | 0.118 | No |
| CHRNA2 (rs56372821) | 1.000 | 1.000 | 100.0 | G | A | 0.000 | No |
| CNR1 (rs1049353) | 0.575 | 1.000 | 100.0 | C | T | 0.279 | Yes |
| CNR1 (rs2023239) | 1.000 | 1.000 | 100.0 | T | C | 0.169 | Yes |
| CNR1 (rs6454674) | 0.766 | 1.000 | 100.0 | T | G | 0.260 | Yes |
| CNR1 (rs806368) | 0.304 | 1.000 | 100.0 | T | C | 0.331 | Yes |
| CNR1 (rs806374) | 0.162 | 1.000 | 100.0 | T | C | 0.416 | Yes |
| CNR1 (rs806378) | 1.000 | 1.000 | 100.0 | C | T | 0.260 | Yes |
| CNR1 (rs806380) | 1.000 | 1.000 | 100.0 | A | G | 0.312 | Yes |
| CNR2 (rs2229579) | 0.545 | 1.000 | 96.1 | G | A | 0.333 | Yes |
| CNR2 (rs2501432) | < 0.001 | 0.001 | 84.4 | T | C/G | - | No |
| COMT (rs4680) | 0.648 | 1.000 | 100.0 | G | A | 0.481 | Yes |
| CYP2C9 (rs1057910) | < 0.001 | < 0.001 | 29.9 | A | C | 0.348 | No |
| CYP2C9 (rs1799853) | 1.000 | 1.000 | 100.0 | C | T | 0.117 | Yes |
| CYP3A5 (rs776746) | 0.174 | 1.000 | 100.0 | T | C | 0.955 | No |
| FAAH (rs2295633) | < 0.001 | 0.001 | 54.5 | A | G/T | - | No |
| FAAH (rs324420) | 1.000 | 1.000 | 100.0 | C | A | 0.143 | Yes |
| GABRA2 (rs279858) | 0.021 | 0.314 | 98.7 | T | C | 0.493 | Yes |
| HES7 (rs1442849) | 0.596 | 1.000 | 100.0 | C | T | 0.312 | Yes |
| KAT2B (rs9829896) | 0.481 | 1.000 | 100.0 | C | A | 0.610 | Yes |
| NRG1 (rs17664708) | 0.530 | 1.000 | 100.0 | C | T | 0.097 | Yes |
| OPRM1 (rs1799971) | 1.000 | 1.000 | 100.0 | A | G | 0.195 | Yes |
| OPRM1 (rs510769) | 0.535 | 1.000 | 100.0 | C | T | 0.240 | Yes |
| P2RX7 (rs7958311) | 0.306 | 1.000 | 74.0 | G | A | 0.263 | No |

Multiple testing corrections were performed for adjusting multilocus analyses by Bonferroni correction with an effective number of 15 variants; Criteria for variant exclusion: 1) genotyping call rate inferior to 95%; 2) statistically significant departures from HWE (after multiple testing correction); 3) Minor allele frequency (MAF) inferior to 5%; 4) more than one mutant allele; 5) Alleles are based on the NCBI nomenclature.
